# Supplementary material for: Assessment of Soil Erosion Vulnerability in the Heavily Populated and Ecologically Fragile Communities in Motozintla De Mendoza, Chiapas, Mexico
Source: Copernicus journal article supplement (doi:10.5194/se-2017-85), 2017-11-01
Supplement: Supplementary file 1 [file Survey general questions and responses per community.xlsx]

## Sheet: Gral interviews
Community	Num. Interview	House Num	Sex	Age	Education	Long living there (years)	Work location	Incomes	Kind of payment	Monthly pay	Have you heard about soil erosion?	What is erosion?	Where is the erosion area located?	How extent is the eroded area? (ha)	Since when have been eroded? (years)	Factors of erosion in those areas:	Soil use in those areas	How long have been used those areas (Years)	Consequences of areas with erosion:	Where those knowlegde were gotten:	There are solutions to the problem?	What do you do to reduce the eroded areas?	What do you do if a landslide is ocurring in this moment?	Who do you think should solve the problem of erosion?	What your community does to reduce erosion problems?
Benito Juarez	1	S/N	M	54	Drop out elementary in forth grade	54	Own land	No	---------	---------	No	Not know	En el propio terreno y cerca de la propia casa	3.5 has	14	Roads constructions	None (Rocks in the area)	10	Deforestation	Family	Yes	Walls	Notify to civil protection	Civil protection	Procedures documents in the capital with no response
Benito Juarez	2	S/N	M	43	Drop out elementary in forth grade	43	Own land	No	---------	---------	Yes	Soil depletion due to lack of trees	El centro de Benito Juarez	10 has	20	Deforestation	Growing corn and beans	More than 15	Global warning	Family	Yes	Reforestation	Terracing and reforestation	Government	Nothing
Benito Juarez	3	S/N	M	70	Drop out elementary in second grade	4	Own land	Yes	Government support Amanecer y Procampo	Equal or less than 1000	No	Not know	Por partes	Not Know	4	Hurricans	None (Rocks in the area)	Not know	Houses destruction	Own experience	Yes	Reforestation	Notify to civil protection	Civil protection	Not know
Benito Juarez	4	S/N	F	19	Currently second grade of high school	12	Student	Yes	Government support beca Oportunidades	Equal or less than 1000	Yes	Usage of chemical products in soil, causing contamination	No sabe	Not Know	Not Know	Not know	Not know	Not know	Not know	School	Yes	Don't burn trash, stop using chemicals and make compost	Leave home and find a safe place	Government	Reforestation
Benito Juarez	5	S/N	F	29	Finished Middle school	29	Housewife	No	---------	---------	Yes	Soil depletion due to lack of trees	Orilla de la carretera	3 cuerdas	7	Rainfall	Astilleros for firewood	5	Not know	Not know	Yes	Don't burn trash, stop using chemicals and make compost	Leave home and find a safe place	Government	Reforestation
Benito Juarez	6	S/N	M	65	Drop out elementary in forth grade	65	Own land	Yes	Government support Procampo	Equal or less than 1000	No	Not know	En toda la comunidad de Benito Juarez	300 mts	14	Agriculture	Corn crops	More than 15	Houses destruction	Family	Yes	Reforestation	Leave home and find a safe place	Community then government	Reforestation
Benito Juarez	7	S/N	M	51	Drop out elementary in forth grade	51	Own land	Yes	Government support Procampo	Equal or less than 1000	Yes	Usage of chemical products in soil, causing contamination	Cerca de la casa de don Severiano	180 mts de largo	14	Rainfall	None (Rocks in the area)	More than 15	Human deaths	School	Yes	Reforestation	Leave home and find a safe place	No one	Terracing
Benito Juarez	8	S/N	F	26	Finished Middle school	8	Housewife	No	---------	---------	No	Not know	Orilla de la carretera	3 km	7	Stan Hurrican (2005)	Grazing of cattle, sheep and horses	10	Mudslides	Family	No	It cannot be reduced	Leave home and find a safe place	Government	Reforestation
Benito Juarez	9	S/N	F	30	Drop out elementary in third grade	1	Housewife	Yes	Government support Oportunidades	Equal or less than 1000	No	Not know	No sabe	Not Know	Not Know	Not know	Not know	Not know	Not know	Not know	No	Not know	Leave home and find a safe place	Not know	Not know
Benito Juarez	10	S/N	M	48	Drop out elementary in second grade	48	Own land	No	---------	---------	No	Not know	Close to the same home (500 mts approx)	2 cuerdas	14	Not know	Astilleros for firewood	More than 15	Human deaths	Family	Yes	Reforestation	Leave home and find a safe place	Government	Reforestation
Benito Juarez	11	S/N	M	40	Drop out elementary in third grade	7	Many places	No	---------	---------	Yes	Soil depletion due to lack of trees	Orilla de la carretera cerca de la casa ejidal	1 km	14	Deforestation	Corn crops	More than 15	Human deaths	Own experience	Yes	Walls	Exit and take refuge in a safe place	Government	Reforestation
Benito Juarez	12	S/N	F	28	Finished Elementary	7	Housewife	Yes	Government support Oportunidades	Equal or less than 1000	Yes	Landslides	No sabe	Not Know	Not Know	Not know	Not know	Not know	Not know	Family	No	Not know	Leave home and find a safe place	Civil protection	Nothing
Benito Juarez	13	S/N	F	38	Finished Elementary	13	Housewife	Yes	Government support Oportunidades	Equal or less than 1000	No	Not know	No sabe	Not Know	Not Know	Not know	Not know	Not know	Not know	Not know	Yes	Not know	Leave home and find a safe place	Community	Not know
Benito Juarez	14	S/N	F	49	Drop out elementary in first grade	11	Housewife	Yes	Government support Oportunidades	Equal or less than 1000	No	Not know	No sabe	Not Know	Not Know	Not know	Not know	Not know	Not know	Not know	Yes	Not know	Leave home and find a safe place	God	Not know
Benito Juarez	15	S/N	M	18	Finished Elementary	18	Own land	Yes	Government support Oportunidades	Equal or less than 1000	No	Not know	Abajo de la casa de don Severiano	3 has	7	Deforestation	None (Rocks in the area)	5	Soil unuse for crops	Own experience	Yes	Reforestation	Run	Community	Terracing
Benito Juarez	16	S/N	F	35	Finished Elementary	35	Housewife	No	---------	---------	No	Not know	No sabe	Not Know	Not Know	Not know	Not know	Not know	Not know	Not know	No	Not know	Leave home and find a safe place	Community then government	Nothing
Benito Juarez	17	S/N	F	45	Drop out elementary in second grade	45	Own land	Yes	Government support Oportunidades y Procampo	Equal to 1500	No	Not know	Cerca de Linda Vista	1 ha	13	Soil Vulnerability	None (Rocks in the area)	5	Soil unuse for crops	Own experience	No	Not know	Ask for help to the authorities	Civil protection	Terracing
Benito Juarez	18	S/N	F	18	Secondary (2)	10	Housewife	No	---------	---------	No	Not know	Cerca de la iglesia pentecostes y de la casa de la señora aurora	1/4 ha	0.5	Rainfall and Land without protection	None (Rocks in the area)	5	Landslides	Own experience	No	Not know	Leave home and find a safe place	Not know	Not know
Benito Juarez	19	S/N	F	45	Finished Middle school	45	Housewife	Yes	Government support Oportunidades	Equal or less than 1000	No	Not know	Cerca de la iglesia pentecostes	2 has	7	Stan Hurrican (2005)	None (Rocks in the area)	Less than 5	Not know	Church	No	Not know	Leave home and find a safe place	Government	Nothing
Benito Juarez	20	S/N	F	27	Finished Middle school	27	Housewife	Yes	Government support Oportunidades	Equal or less than 1000	No	Not know	Cerca de la casa de señora Aurora	2 has	1	Rainfall	None (Rocks in the area)	More than 15	Human deaths	Family	Yes	Not know	Leave home and find a safe place	Government	Terracing and reforestation
Benito Juarez	21	S/N	M	54	Finished Elementary	54	Own land	No	---------	---------	Yes	Landslides	A lado de la escuela	5 has	14	Hurricans	None (Rocks in the area)	Not know	Soil unuse for crops	Own experience	Yes	Terracing and reforestation	Leave home and find a safe place	Community	Terracing
Benito Juarez	22	S/N	F	33	Drop out elementary in second grade	33	Housewife	No	---------	---------	No	Not know	Cerca de la carretera y donde estaba la iglesia pentecostes	2 has	2	Not know	None (Rocks in the area)	More than 15	Not know	Family	No	Not know	Leave home and find a safe place	Government	Nothing
Benito Juarez	23	S/N	M	45	Finished Elementary	6	Own land	Yes	Government support Procampo	Equal or less than 1000	Yes	Infertility	Cerca de las carreteras y cerca de la iglesia pentecostes y el astillero	3 has	3	Deforestation	Corn crops	15	Landslides	Books	Yes	Reforestation	Notify to civil protection	Community	Nothing
Benito Juarez	24	S/N	M	27	Finished Middle school	27	Own land	Yes	Government support Procampo	Equal or less than 1000	No	Not know	Orilla de la carretera	3 km	13	Rainfall	Corn crops	More than 15	Landslides	Own experience	Yes	Reforestation	Leave home and find a safe place	Government then community	Terracing and reforestation
Benito Juarez	25	S/N	M	20	Finished Middle school	20	Own land	No	---------	---------	No	Not know	En los rios cercanos	Not Know	10	Slopes	Corn crops	More than 15	Landslides	School	Yes	Reforestation	Hope in God	Government	Reforestation
Benito Juarez	26	S/N	M	50	Drop out elementary in fifth grade	50	Own land	No	---------	---------	Yes	Soil depletion due to lack of trees	En el propio terreno	2 has	14	Roads constructions	None (Rocks in the area)	More than 15	Landslides	Family	Yes	Terracing	Leave home and find a safe place	Government	Nothing
Benito Juarez	27	S/N	M	22	Finished Middle school	2	Town (out of home)	No	---------	---------	No	Not know	Astillero	De 3 a 5 has	2	Rainfall and Land without protection	Astilleros for firewood	More than 15	Landslides	Own experience	Yes	Terracing and reforestation	Leave home and find a safe place	Government then community	Terracing
Benito Juarez	28	S/N	M	61	Secondary (2)	5	Consesion rents	Yes	Social Security Pension	Equal or less than 2500	No	Not know	Gran parte de benito Juarez, cerca de la iglesia pentecostes	4 o 5 has	17	Rainfall	None (Rocks in the area)	More than 15	Landslides	Own experience	Yes	Walls	Leave home and find a safe place	Government	Reforestation
Benito Juarez	29	S/N	M	89	Drop out elementary in third grade	89	Own land	Yes	Government support Amanecer y 70 y mas	Equal or less than 1000	Yes	Landslides	Close to Pentecostes church	6 has	17	Mitch Hurrican (1998)	None (Rocks in the area)	More than 15	Mudslides	School	Yes	God will	Leave home and find a safe place	Government	Nothing
Benito Juarez	30	S/N	M	37	Drop out elementary in forth grade	12	Town (out of home)	No	---------	---------	No	Not know	Orilla de la carretera y todo Benito Juarez	200 mts	14	Mitch Hurrican (1998)	Corn crops	More than 15	Mudslides	Own experience	Yes	Reforestation	Notify to civil protection	Community	Reforestation
Benito Juarez	31	S/N	M	45	Finished Elementary	45	Own land	Yes	Government support Procampo	Equal or less than 1000	Yes	Not remember	A lado izquiero de la comunidad cerca de Chevolcan	10 has	14	God	None (Rocks in the area)	More than 15	Mudslides	Family	Yes	Reforestation and make walls	Leave home and find a safe place	Government	Terracing and reforestation
Benito Juarez	32	S/N	M	24	Finished Middle school	10	Construction	No	---------	---------	No	Not know	No sabe	Not Know	Not Know	Not know	Not know	Not know	Not know	Not know	Yes	Not know	Leave home and find a safe place	Government	Nothing
Benito Juarez	33	S/N	M	66	Unlettered	60	Own land	Yes	Government support Procampo	Equal or less than 1000	No	Not know	Orilla de la carretera	5 cuerdas	1	Rainfall	Trees cutting	10	Not know	Family	Yes	Reforestation	Hope in God	Government	Terracing and reforestation
Benito Juarez	34	S/N	F	86	Unlettered	16	Housewife	Yes	Government support Oportunidades	Equal or less than 1000	No	Not know	No sabe	Not Know	15	Roads constructions	Vegetables (Harvest jalapeño chile, beans, carrots)	More than 15	Soil unuse for crops	Own experience	Yes	Reforestation	Leave home and find a safe place	Government	Reforestation
Benito Juarez	35	S/N	F	75	Unlettered	75	Housewife	Yes	Government support Oportunidades	Equal or less than 1000	No	Not know	Cerca de las vegas a lado izquierdo de la carretera	Not Know	7	Not know	Vegetables (Harvest jalapeño chile, beans, carrots)	5	Mudslides	Family	Yes	Reforestation	Hope in God	Government	Terracing and reforestation
Benito Juarez	36	S/N	M	43	Drop out elementary in third grade	43	Own land	No	---------	---------	No	Not know	Centro de Benito Juarez	200 mts	2	Rainfall	None (Rocks in the area)	More than 15	Not know	Government program	Yes	Reforestation	Leave home and find a safe place	Civil protection	Nothing
Benito Juarez	37	S/N	M	76	Drop out elementary in third grade	76	Own land	Yes	Government support Procampo	Equal or less than 1000	Yes	Soil depletion due to lack of trees	En casi todo el ejido de Benito Juarez	1 ha	14	Rainfall and Land without protection	None (Rocks in the area)	Not know	Not know	Government program	Yes	Reforestation	Care about neighbors	No one	Nothing
Benito Juarez	38	S/N	M	54	Finished Elementary	30	Own land	Yes	Government support Procampo	Equal or less than 1000	Yes	Soil depletion due to lack of trees	Close to the same home (500 mts approx)	100 mts	7	Stan Hurrican (2005)	None (Rocks in the area)	Not know	Not know	Government program	Yes	Reforestation	Leave home and find a safe place	Community then government	Reforestation
Benito Juarez	39	S/N	M	45	Finished Elementary	10	Own land	Yes	Government support Procampo	Equal or less than 1000	No	Not know	Los rios, cañadas, orilla de carreteras y caminos rurales	1 ha	Not Know	Deforestation	Growing corn and beans	10	Not know	Not know	Yes	Reforestation	Leave home and find a safe place	Community	Terracing and reforestation
Benito Juarez	40	S/N	M	52	Finished Elementary	52	Own land	No	---------	---------	Yes	Soil depletion due to lack of trees	Cerca del centro de Benito Juarez	2 has	7	Stan Hurrican (2005)	None (Rocks in the area)	More than 15	Not know	Family	Yes	Terracing and reforestation	Not know	Government	Nothing
Benito Juarez	41	S/N	M	35	Drop out elementary in fifth grade	35	Own land	No	---------	---------	Yes	Soil depletion due to lack of trees	Close to the same home (500 mts approx)	800 mts	7	Rainfall	None (Rocks in the area)	Not know	Not know	Government program	Yes	Terracing and reforestation	Leave home and find a safe place	Government	Nothing
Benito Juarez	42	S/N	M	50	Drop out elementary in forth grade	50	Own land	Yes	Government support Procampo	Equal or less than 1000	Yes	Soil depletion due to lack of trees	Close to the same home (500 mts approx)	200 mts	7	Stan Hurrican (2005)	None (Rocks in the area)	Not know	Not know	Not know	Yes	Terracing and reforestation	Leave home and find a safe place	Civil protection	Nothing
Benito Juarez	43	S/N	F	53	Finished Middle school	53	Congregated	Yes	Seller	Equal or less than 1000	No	Not know	Cerca de tular (limites)	2 has	5	Rainfall and Land without protection	None (Rocks in the area)	5	Human deaths	Own experience	Yes	Reforestation	Notify to civil protection	Community	Terracing
Benito Juarez	44	S/N	F	70	Drop out elementary in second grade	70	Housewife	Yes	Government support Oportunidades	Equal or less than 1000	No	Not know	Derrumbes cerca de la iglesia pentecostes	2 has	2	Hurricans	None (Rocks in the area)	More than 15	Soil unuse for crops	Family	Yes	Reforestation	After landslide make reforestation	Community	Nothing
Benito Juarez	45	S/N	M	33	Finished Elementary	32	Own land	No	---------	---------	Yes	Soil depletion due to lack of trees	Astillero	800 mts	7	Rainfall	None (Rocks in the area)	Not know	Not know	Not know	Yes	Walls	Ask for help to the authorities	Government	Not know
Benito Juarez	46	S/N	M	40	Finished Middle school	40	Own land	Yes	Government support Procampo	Equal or less than 1000	Yes	Soil depletion due to lack of trees	En la misma casa (partidura), donde estaba la iglesia pentecostes antes	1 ha	Not know	Stan Hurrican (2005)	None (Rocks in the area)	More than 15	Human deaths	Own experience	Yes	Reforestation	Leave home and find a safe place	Government	Reforestation
Benito Juarez	47	S/N	F	49	Drop out elementary in third grade	5	Housewife	Yes	Government support Oportunidades	Equal or less than 1000	No	Not know	Cerca de la casa de don Severiano	5 cuerdas	7	Stan Hurrican (2005)	None (Rocks in the area)	5	Landslides	Government program	Yes	Reforestation	Leave home and find a safe place	Government	Environmental education from ECOSUR
Benito Juarez	48	S/N	F	38	Drop out elementary in forth grade	38	Housewife	No	---------	---------	No	Not know	Cerca de donde estaba la iglesia pentecostes	1 ha	7	Stan Hurrican (2005)	None (Rocks in the area)	More than 15	Soil unuse for crops	Family	Yes	Reforestation	Nothing	Not know	Terracing
Benito Juarez	49	S/N	F	62	Drop out elementary in third grade	62	Housewife	Yes	Government support Oportunidades	Equal or less than 1000	Yes	Soil depletion due to lack of trees	Cerca de la casa el señor Herminio Lopez Velazquez	9 cuerdas	5	Agriculture	None (Rocks in the area)	More than 15	Human deaths	Own experience	Yes	Reforestation	Help affected houses	Government	Reforestation
Benito Juarez	50	S/N	M	41	Finished Elementary	4	Own land	Yes	Mason	Equal or less than 1000	No	Not know	Benito Juarez town	1 ha	2	Rivers	None (Rocks in the area)	Less than 5	Human deaths	Own experience	Yes	Terracing and reforestation	Only wait	Civil protection	Terracing and reforestation
Benito Juarez	51	S/N	F	26	Drop out elementary in forth grade	11	Housewife	Yes	Government support Oportunidades	Equal or less than 1000	No	Not know	En muchas partes	1-3 cuerdas	10	Rainfall	Growing corn and beans	More than 15	Human deaths	Family	Yes	Reforestation	Leave home and find a safe place	Government	Terracing and reforestation
Benito Juarez	52	S/N	F	29	Finished Elementary	29	Housewife	Yes	Government support Oportunidades	Equal or less than 1000	No	Not know	Cerca de la casa de don Severiano	3 has	Not Know	Stan Hurrican (2005)	Corn crops	More than 15	Landslides	Family	Yes	Reforestation	Not know	Community	Garbage Collection
Benito Juarez	53	S/N	F	25	Finished Middle school	3	Housewife	Yes	Government support Oportunidades	Equal or less than 1000	No	Not know	Orilla de carretera en ambos lados de Benito Juarez	Everywhere	14	Deforestation	Corn crops	More than 15	Mudslides	Family	Yes	Reforestation	Exit and take refuge in a safe place	Government	Reforestation
Benito Juarez	54	S/N	F	41	Finished Elementary	41	Renting	Yes	Government support Oportunidades	Equal or less than 1000	No	Not know	Cerca de la vuelta del coyote	10 has	9	Deforestation	Astilleros for firewood	More than 15	Soil unuse for crops	Own experience	Yes	Reforestation	Ask for help to the authorities	Community	Terracing
Benito Juarez	55	S/N	F	29	Finished Elementary	5	Housewife	Yes	Government support Oportunidades	Equal or less than 1000	Yes	Soil depletion due to lack of trees	Cerca de la iglesia pentecostes	3 has	6	Deforestation	Astilleros for firewood	Not know	Human deaths	Own experience	Yes	Reforestation	Leave home and find a safe place	Government then community	Not know
Benito Juarez	56	S/N	F	23	Finished Elementary	10	Housewife	Yes	Government support Oportunidades	Equal or less than 1000	No	Not know	Cerca de loma bonita	Not Know	2	Stan Hurrican (2005)	Astilleros for firewood	More than 15	Human deaths	Family	Yes	Reforestation	Ask for help to the authorities	Government	Reforestation
Benito Juarez	57	S/N	F	34	Finished Elementary	34	Housewife	Yes	Government support Oportunidades	Equal or less than 1000	No	Not know	Cerca deun camino rumbo a chevolcan	5 cuerdas de ancho	14	Rainfall	Astilleros for firewood	More than 15	Human deaths	Own experience	Yes	Reforestation	Leave home and find a safe place	Government	Reforestation
Benito Juarez	58	S/N	F	18	Finished Middle school	7	Housewife	No	---------	---------	No	Not know	Close to the same home (500 mts approx)	Not Know	Not Know	Deforestation	Astilleros for firewood	More than 15	Soil unuse for crops	Own experience	Yes	Reforestation	Leave home and find a safe place	Community	Reforestation
Benito Juarez	59	S/N	F	36	Finished Elementary	36	Housewife	No	---------	---------	No	Not know	Cerca de la carretera y la propia casa esta partida	2 has	5	Roads constructions	Corn crops	More than 15	Landslides	Family	Yes	Reforestation and make walls	Leave home and find a safe place	Government	Nothing
Benito Juarez	60	S/N	F	46	Finished Elementary	46	Housewife	Yes	Government support Oportunidades	Equal or less than 1000	No	Not know	Cerca de la iglesia pentecostes	1/2 ha	7	Stan Hurrican (2005)	Corn crops	More than 15	Soil unuse for crops	School	Yes	Reforestation and make walls	Exit and take refuge in a safe place	Civil protection	Reforestation
Benito Juarez	61	S/N	F	34	Finished Elementary	34	Housewife	Yes	Government support Oportunidades	Equal or less than 1000	No	Not know	No sabe	Not Know	Not Know	Not know	Not know	Not know	Not know	Not know	Yes	Stop trees cuting	Leave home and find a safe place	Civil protection	Not know
Benito Juarez	62	S/N	F	37	Finished Elementary	16	Housewife	Yes	Government support Oportunidades	Equal or less than 1000	No	Not know	Cerca de la carretera y donde estaba la iglesia pentecostes	20 mts aprox	1	Not know	None (Rocks in the area)	Less than 5	Not know	ECOSUR	Yes	Stop trees cuting	Leave home and find a safe place	Community	Nothing
Benito Juarez	63	S/N	F	20	Finished Middle school	5	Housewife	No	---------	---------	Yes	Landslides	No sabe	Not Know	Not Know	Not know	Not know	Not know	Not know	School	No	Terracing	Leave home and find a safe place	Government	Reforestation
Benito Juarez	64	S/N	F	22	Finished Middle school	22	Housewife	Yes	Government support Oportunidades	Equal or less than 1000	No	Not know	Cerca de Loma Bonita	3 has	2	Hurricans	None (Rocks in the area)	5	Houses destruction	Own experience	No	Terracing	Make organization groups for reforestation	Civil protection	Terracing
Benito Juarez	65	S/N	F	19	Drop out elementary in first grade	19	Own land	Yes	Mason	Equal or less than 1000	No	Not know	Cerca de la propiedad	10 has	7	Hurricans	None (Rocks in the area)	10	Mudslides	Own experience	Yes	Terracing and reforestation	Ask for help to the authorities	Community	Terracing
Benito Juarez	66	S/N	F	62	Drop out elementary in second grade	62	Housewife	No	---------	---------	No	Not know	El centro de Benito Juarez	500 mts	14	Hurricans	None (Rocks in the area)	More than 15	Soil unuse for crops	Family	Yes	Terracing and reforestation	Leave home and find a safe place	Civil protection	Nothing
Benito Juarez	67	S/N	F	35	Drop out elementary in fifth grade	35	Housewife	No	---------	---------	No	Not know	Roads	Everywhere	7	Stan Hurrican (2005)	None (Rocks in the area)	5	Mudslides	Family	Yes	Terracing and reforestation	Leave home and find a safe place	Government	Reforestation
Benito Juarez	68	S/N	F	20	Finished Elementary	1	Housewife	No	---------	---------	No	Not know	Orilla de la carretera	1 cuerda	14	Rainfall	Growing corn and beans	10	Deforestation	Own experience	Yes	Terracing and reforestation	Leave home and find a safe place	Government	Reforestation
Benito Juarez	69	S/N	F	50	Drop out elementary in forth grade	50	Housewife	Yes	Government support Oportunidades	Equal or less than 1000	No	Not know	All Vicente guerrero	3 cuerdas	7	Stan Hurrican (2005)	Corn crops	5	Landslides	Family	Yes	Terracing and reforestation	Leave home and find a safe place	Community	Reforestation
Benito Juarez	70	S/N	F	57	Drop out elementary in second grade	24	Housewife	Yes	Government support Oportunidades	Equal or less than 1000	No	Not know	Los barrancos en la orilla de la carretera	15-20 mts	7	Stan Hurrican (2005)	Astilleros for firewood	10	Landslides	Family	Yes	Terracing and reforestation	Make walls	Civil protection	Reforestation
Benito Juarez	71	S/N	F	18	Finished Middle school	18	Housewife	No	---------	---------	Yes	Earthquakes, and land subsidence due to rain	Cerca de la iglesia pentecostes	2 has	3	Rainfall	Vegetables (Harvest jalapeño chile, beans, carrots)	More than 15	Landslides	Church	Yes	Making walls	Run	Government	Not know
Benito Juarez	72	S/N	F	67	Drop out elementary in second grade	67	Housewife	Yes	Government support Oportunidades	Equal or less than 1000	Yes	Landslides	Close to the same home (500 mts approx)	30-40 mts	7	Rainfall	None (Rocks in the area)	Not know	Not know	Not know	Yes	Making walls	Leave home and find a safe place	Civil protection	Nothing
Cambil	73	S/N	F	32	Finished Elementary	12	Housewife	Yes	Government support Oportunidades	Equal or less than 1000	Yes	Soil depletion due to lack of trees	No hay	-----------------	-----	Not answered	Vegetables (Harvest jalapeño chile, beans, carrots)	More than 15	Soil loss	Church	Yes	Environmental education	Leave home and find a safe place	Community	Garbage Collection
Cambil	74	25	F	53	Drop out elementary in forth grade	25	Housewife	Yes	Government support Oportunidades	Equal or less than 1000	Yes	Landslides	Roads	Not Know	5	Rainfall	None (Rocks in the area)	Not know	Not know	Own experience	Yes	Government support	Leave home and find a safe place	Government	Nothing
Cambil	75	28	F	38	Finished Elementary	12	Housewife	Yes	Government support Oportunidades	Equal or less than 1000	No	Not know	No hay	-----------------	-----	Not answered	Vegetables (Harvest jalapeño chile, beans, carrots)	More than 15	Mudslides	Own experience	Yes	Reforestation	After landslide make reforestation	Community	Nothing
Cambil	76	21	M	53	Drop out elementary in third grade	25	Own land	No	---------	---------	No	Not know	Astillero	20 has	10	Rainfall	Grazing of cattle, sheep and horses	More than 15	Landslides	Own experience	Yes	Reforestation	Ask for help to the authorities	Government then community	Reforestation
Cambil	77	12	M	18	Finished Elementary	18	Own land	No	---------	---------	No	Not know	Potreros de la comunidad	2 has	8	Stan Hurrican (2005)	Astilleros for firewood	More than 15	Landslides	Own experience	Yes	Reforestation	Leave home and find a safe place	Community then government	Nothing
Cambil	78	13	M	61	Drop out elementary in third grade	20	Own land	Yes	Government support Procampo	Equal or less than 1000	Yes	Soil depletion due to lack of trees	No hay	-----------------	-----	Slopes	Vegetables (Harvest jalapeño chile, beans, carrots)	More than 15	Landslides	Government program	Yes	Terracing	Leave home and find a safe place	Community	Nothing
Cambil	79	30	M	45	Finished Elementary	43	Own land	No	---------	---------	No	Not know	Astilleros	5 has	More than 15	Grazing	Grazing of cattle, sheep and horses	More than 15	Mudslides	Own experience	Yes	Reforestation	Help affected houses	Government then community	Environmental education from ECOSUR
Cambil	80	S/N	M	31	Drop out elementary in second grade	24	Own land	No	---------	---------	Yes	Usage of chemical products in soil, causing contamination	No sabe	Not Know	Not Know	Not know	None (Rocks in the area)	Less than 5	Not know	Own experience	Yes	Don't burn trash, stop using chemicals and make compost	Leave home and find a safe place	Government then community	Nothing
Cambil	81	S/N	M	64	Drop out elementary in forth grade	15	Own land	Yes	Government support Procampo	Equal or less than 1000	No	Not know	Cerca de la misma casa	0.004 has	1	Rainfall	Grazing of cattle, sheep and horses	Less than 5	Not know	Family	Yes	Reforestation	Leave home and find a safe place	Government	Nothing
Cambil	82	14	M	83	Drop out elementary in first grade	83	Own land	Yes	Government support Amanecer y 70 y mas	Equal or less than 1000	Yes	Landslides	a 1 km cerca de la misma casa	Not Know	7	Rainfall	None (Rocks in the area)	Not know	Not know	Own experience	Yes	Reforestation and make channels	Leave home and find a safe place	Government	Corn crops
Cambil	83	15	M	27	Finished Elementary	27	Own land	No	---------	---------	Yes	Landslides	No sabe	Roads	14	Roads constructions	Vegetables (Harvest jalapeño chile, beans, carrots)	10	Not know	Own experience	Yes	Walls	Exit and take refuge in a safe place	Government	Nothing
Cambil	84	11	M	31	Finished Elementary	4	Own land	No	---------	---------	Yes	Earthquakes, and land subsidence due to rain	En la Vega de las Palomas	3 has	8	Stan Hurrican (2005)	None (Rocks in the area)	Less than 5	Human deaths	Own experience	Yes	Reforestation	Leave home and find a safe place	Community	Reforestation
Cambil	85	5	M	53	Drop out elementary in fifth grade	25	Own land	No	---------	---------	Yes	Global warming, dry soil, forest fires	Partes mas bajas cercanos a la carretera	4 has	18	Roads constructions	None (Rocks in the area)	More than 15	Soil loss	ECOSUR	Yes	Terracing and reforestation	Leave home and find a safe place	Government then community	Nothing
Cambil	86	9	F	39	Drop out elementary in third grade	39	Housewife	Yes	Government support Oportunidades	Equal or less than 1000	No	Not know	Potreros de la comunidad	2 has	8	Stan Hurrican (2005)	None (Rocks in the area)	Not know	Landslides	Own experience	Yes	Reforestation	Leave home and find a safe place	Community	Nothing
Cambil	87	9	F	22	Finished Middle school	6	Housewife	Yes	Government support Oportunidades	Equal or less than 1000	No	Not know	Cerca de la casa de la sra. Alejandra Verdugo	Not Know	Always	Slopes	None (Rocks in the area)	More than 15	Landslides	Church	Yes	Reforestation	Leave home and find a safe place	Community	Reforestation
Cambil	88	22	F	60	Unlettered	30	Housewife	Yes	Government support Oportunidades	Equal or less than 1000	No	Not know	Astillero	10 has	8	Rainfall	Grazing of cattle, sheep and horses	More than 15	Landslides	Own experience	Yes	Reforestation	Only wait	Community	Nothing
Cambil	89	27	F	62	Drop out elementary in third grade	25	Housewife	Yes	Government support Oportunidades	Equal or less than 1000	No	Not know	Astillero	10 has	8	Stan Hurrican (2005)	Grazing of cattle, sheep and horses	More than 15	Landslides	Own experience	Yes	Reforestation	After landslide make reforestation	Community	Nothing
Cambil	90	4	F	31	Finished Elementary	3	Housewife	Yes	Government support Oportunidades	Equal or less than 1000	No	Not know	Hay muchos	0.05 has	Always	Rainfall	Corn crops	Less than 5	Not know	Own experience	Yes	Terracing and reforestation	Leave home and find a safe place	Government	Corn crops
Carrizal	91	S/N	F	54	Drop out elementary in second grade	54	Housewife	Yes	Government support Oportunidades	Equal or less than 1000	No	Not know	En la misma casa (partidura)	0.008 has	8	Roads constructions	Growing corn and beans	More than 15	Houses destruction	Own experience	Yes	Buy a new land	Leave home and find a safe place	Government then community	Reforestation
Carrizal	92	S/N	F	27	Finished Elementary	22	Housewife	No	---------	---------	Yes	Landslides	Las carreteras cerca de la telesecundaria y el albergue	3 has	6	Rainfall	Corn crops	More than 15	Landslides	Own experience	Yes	Environmental education	Only wait	God	Trenches
Carrizal	93	S/N	F	50	Drop out elementary in third grade	50	Housewife	Yes	Government support Oportunidades	Equal or less than 1000	No	Not know	Roads	Not Know	7	Stan Hurrican (2005)	Corn crops	10	Landslides	Own experience	No	It cannot be reduced	Leave home and find a safe place	Government	Walls
Carrizal	94	S/N	F	25	Drop out elementary in third grade	7	Housewife	No	---------	---------	No	Not know	No contesto	No answered	No answered	Not answered	Not answered	Not answered	Not know	Not answered	No	Not know	Not know	Not answered	Nothing
Carrizal	95	S/N	F	74	Unlettered	74	Housewife	No	---------	---------	No	Not know	Escuela primaria destruida	0.04 has	7	Stan Hurrican (2005)	None (Rocks in the area)	More than 15	Houses destruction	Own experience	No	Not know	Leave home and find a safe place	Government	Reforestation
Carrizal	96	S/N	F	69	Drop out elementary in second grade	69	Housewife	Yes	Government support Oportunidades	Equal or less than 1000	No	Not know	Toda la comunidad	0.0001 has	7	Stan Hurrican (2005)	Human settlement	More than 15	Landslides	Own experience	No	Not know	Leave home and find a safe place	Government	Reforestation
Carrizal	97	S/N	F	55	Finished Elementary	55	Housewife	No	---------	---------	No	Not know	En su propia casa y terreno	0.012 has	7	Slopes	Growing corn and beans	More than 15	Not know	Own experience	No	Not know	Leave home and find a safe place	Government	Nothing
Carrizal	98	S/N	F	67	Finished Elementary	67	Housewife	Yes	Government support Oportunidades	Equal or less than 1000	No	Not know	Cerca de la casa del sr. Hermenegildo	1.5 has	8	Stan Hurrican (2005)	Corn crops	More than 15	Soil unuse for crops	Own experience	Yes	Reforestation	Leave home and find a safe place	Government	Nothing
Carrizal	99	S/N	F	72	Drop out elementary in first grade	72	Housewife	Yes	Government support 70 y mas	Equal or less than 1000	No	Not know	Varias partes de carrizal	0.003 has	8	Stan Hurrican (2005)	Corn crops	More than 15	Landslides	Own experience	Yes	Reforestation	Leave home and find a safe place	Government then community	Nothing
Carrizal	100	S/N	F	40	Finished Elementary	40	Own land	Yes	Government support Oportunidades	Equal or less than 1000	No	Not know	En casi todo el ejido de Carrizal	0.005 has	7	Stan Hurrican (2005)	Wheat crops	5	Soil loss	Family	Yes	Reforestation	Leave home and find a safe place	Community then government	Reforestation
Carrizal	101	S/N	F	47	Drop out elementary in second grade	25	Housewife	Yes	Government support Oportunidades	Equal or less than 1000	No	Not know	Cerca de la vega del rio	Not Know	7	Rainfall	Vegetables (Harvest jalapeño chile, beans, carrots)	More than 15	Houses destruction	Own experience	Yes	Reforestation	Leave home and find a safe place	Government	Reforestation
Carrizal	102	S/N	F	68	Drop out elementary in second grade	30	Housewife	No	---------	---------	No	Not know	Astilleros	1 ha	8	Hurricans	Trees cutting	More than 15	Landslides	Own experience	Yes	Reforestation	Leave home and find a safe place	Government then community	Reforestation
Carrizal	103	S/N	F	37	Finished Elementary	37	Housewife	Yes	Government support Oportunidades	Equal or less than 1000	Yes	Landslides	No contesto	No answered	No answered	Not answered	Not answered	Not answered	Landslides	Not answered	Yes	Reforestation	Nothing	Government then community	Nothing
Carrizal	104	S/N	M	43	Drop out elementary in forth grade	12	Own land	No	---------	---------	No	Not know	Cerca de la misma casa	0.016 has	3	Roads constructions	Corn crops	More than 15	Flooding	Own experience	Yes	Terracing and reforestation	Leave home and find a safe place	Government	Terracing and reforestation
Carrizal	105	S/N	M	73	Drop out elementary in second grade	73	Own land	Yes	Government support, amanecer	Equal or less than 1000	No	Not know	400 mts cerca de la casa del sr. Filemon	2 has	8	Rainfall	None (Rocks in the area)	Less than 5	Human deaths	Own experience	Yes	Reforestation	Leave home and find a safe place	Government	Nothing
Carrizal	106	5	M	70	Drop out elementary in forth grade	70	Own land	Yes	Government support, amanecer	Equal or less than 1000	No	Not know	Astillero, cerro brujo	1000 has	More than 15	Stan Hurrican (2005)	Astilleros for firewood	More than 15	Soil unuse for crops	Church	Yes	God will	Leave home and find a safe place	Community	Nothing
Carrizal	107	S/N	F	24	Finished Elementary	24	Housewife	Yes	Government support Oportunidades	Equal or less than 1000	No	Not know	Cerca de Pizarrin	5 has	8	Rainfall	None (Rocks in the area)	Less than 5	Human deaths	Own experience	Yes	Reforestation	Leave home and find a safe place	Government	Reforestation
Carrizal	108	S/N	M	39	Finished high school	39	Own land	No	---------	---------	Yes	Soil depletion due to lack of trees	Cerca del barrio la Pinada	2 has	9	Rivers	Growing corn and beans	More than 15	Soil unuse for crops	School	Yes	Reforestation	Leave home and find a safe place	Community	Reforestation
Carrizal	109	S/N	F	49	Finished Elementary	15	Housewife	No	---------	---------	No	Not know	Terrenos a lado de la casa de la sra. Irma	4 has	8	Stan Hurrican (2005)	None (Rocks in the area)	More than 15	Deforestation	Own experience	Yes	Reforestation	Leave home and find a safe place	Government	Reforestation
Carrizal	110	S/N	M	66	Drop out elementary in third grade	66	Own land	Yes	Government support Procampo	Equal or less than 1000	Yes	Global warming, dry soil, forest fires	Todo carrizal	11 has	15	Deforestation	Corn crops	More than 15	Soil unuse for crops	Own experience	Yes	Reforestation	Care my home	Community	Reforestation
Carrizal	111	168	F	39	Finished Elementary	14	Housewife	Yes	Government support Oportunidades	Equal or less than 1000	No	Not know	Cerca de la casa de la sra. Austreberta	0.005 has	1	Rainfall	None (Rocks in the area)	More than 15	Landslides	Own experience	Yes	Reforestation	Leave home and find a safe place	Community then government	Environmental Education from Catholic Church
Carrizal	112	S/N	M	43	Secondary (2)	43	Own land	No	---------	---------	No	Not know	Escuela primaria destruida	0.012 has	7	Stan Hurrican (2005)	Corn crops	More than 15	Landslides	Own experience	Yes	Channels	Ask for help to the authorities	Government	Reforestation
Carrizal	113	S/N	M	54	Drop out elementary in forth grade	20	Own land	No	---------	---------	Yes	Usage of chemical products in soil, causing contamination	Roads	0.06 has	7	Stan Hurrican (2005)	None (Rocks in the area)	More than 15	Landslides	Own experience	Yes	Don't burn trash, stop using chemicals and make compost	Leave home and find a safe place	Government then community	Walls
Carrizal	114	S/N	F	36	Finished Elementary	36	Housewife	Yes	Government support Oportunidades	Equal or less than 1000	No	Not know	Centro del carrizal	0.006 has	14	Slopes	None (Rocks in the area)	More than 15	Mudslides	Family	Yes	Reforestation	Hope in God	Community	Reforestation
Carrizal	115	S/N	M	78	Drop out elementary in second grade	78	Own land	Yes	Government support Procampo	Equal or less than 1000	No	Not know	En el terreo del sr. Casimiro	1 ha	9	Rainfall	Corn crops	More than 15	Landslides	Own experience	Yes	Reforestation	Leave home and find a safe place	Government	Reforestation
Carrizal	116	S/N	M	47	Drop out elementary in forth grade	47	Own land	Yes	Government support Procampo	Equal or less than 1000	No	Not know	Todo carrizal	0.005 has	7	Rainfall	Astilleros for firewood	More than 15	Landslides	Family	Yes	Reforestation	Leave home and find a safe place	Not know	Reforestation
Carrizal	117	S/N	M	50	Drop out elementary in second grade	50	Own land	Yes	Government support Procampo	Equal or less than 1000	No	Not know	200 mts cerca de la casa del mismo Sr. Enrique	0.003 has	8	Stan Hurrican (2005)	Astilleros for firewood	More than 15	Landslides	Own experience	Yes	Reforestation	Leave home and find a safe place	Government	Nothing
Carrizal	118	S/N	M	46	Finished Elementary	46	Own land	No	---------	---------	No	Not know	Cerca del barrio plan grande	2 has	10	Hurricans	Astilleros for firewood	Less than 5	Landslides	Own experience	Yes	Reforestation	Leave home and find a safe place	Community	Nothing
Carrizal	119	S/N	F	39	Drop out elementary in second grade	16	Housewife	Yes	Government support Oportunidades	Equal or less than 1000	No	Not know	Cerca del barrio la Union	0.0015 has	7	Rainfall	None (Rocks in the area)	More than 15	Not know	Own experience	Yes	Reforestation	Leave home and find a safe place	Government	Nothing
Carrizal	120	S/N	M	47	Finished Elementary	47	Own land	Yes	Government support Procampo	Equal or less than 1000	Yes	Landslides	Centro de Carrizal	0.003 has	15	Deforestation	Growing corn and beans	10	Mudslides	Government program	Yes	Reforestation and make walls	Make walls	Community then government	Reforestation
Carrizal	121	S/N	M	36	Finished Elementary	36	Own land	No	---------	---------	No	Not know	Roads	Not Know	Not Know	Roads constructions	Roads	More than 15	Mudslides	Own experience	Yes	Reforestation	Leave home and find a safe place	Government then community	Reforestation
Carrizal	122	S/N	M	28	Finished Middle school	28	Own land	Yes	Government support Procampo	Equal or less than 1000	Yes	Disasters	Terrenos de cultivo de carrizal	11 has	Not Know	Pollution, trash, plastic and fires burning	Corn crops	More than 15	Mudslides	Own experience	Yes	Reforestation	Leave home and find a safe place	Community	Reforestation
Carrizal	123	S/N	M	44	Finished Elementary	44	Housewife	Yes	Government support Oportunidades	Equal or less than 1000	No	Not know	Todo carrizal	0.016 has	7	Stan Hurrican (2005)	Corn crops	More than 15	Mudslides	Family	Yes	Reforestation	Leave home and find a safe place	Government (Paying for make reforetation)	Reforestation
Carrizal	124	S/N	F	28	Finished Elementary	28	Housewife	Yes	Government support Oportunidades	Equal or less than 1000	No	Not know	Cerca de la casa misma	Not Know	More than 15	Hurricans	Human settlement	More than 15	Landslides	Government program	Yes	Reforestation	Leave home and find a safe place	Government	Reforestation
Carrizal	125	S/N	M	47	Drop out elementary in forth grade	47	Own land	No	---------	---------	Yes	Landslides	Todo carrizal	Everywhere	7	Stan Hurrican (2005)	Corn crops	More than 15	Mudslides	Own experience	Yes	Terracing	Leave home and find a safe place	Government	Reforestation
Carrizal	126	S/N	F	32	Finished Elementary	32	Own land	Yes	Government support Oportunidades	Equal or less than 1000	No	Not know	Orillas de la carretera	Not Know	Always	Rainfall	Growing corn and beans	More than 15	Not know	School	Yes	Reforestation	Leave home and find a safe place	Government then community	Reforestation
Carrizal	127	S/N	M	60	Finished Elementary	60	Own land	Yes	Government support Procampo	Equal or less than 1000	No	Not know	Cerca de la casa de la Sra. Amelia Morales	2 has	8	Stan Hurrican (2005)	Astilleros for firewood	More than 15	Mudslides	Own experience	Yes	Terracing and reforestation	Leave home and find a safe place	Government	Reforestation
Carrizal	128	S/N	F	54	Drop out elementary in third grade	54	Housewife	Yes	Government support Oportunidades	Equal or less than 1000	No	Not know	Derrumbes en algunas casas	1 ha	Always	Rainfall	Growing corn and beans	More than 15	Landslides	Own experience	Yes	Reforestation	Not know	Community	Nothing
Carrizal	129	S/N	M	23	Finished Middle school	23	Own land	Yes	Government support Procampo	Equal or less than 1000	No	Not know	1 km cerca de la misma casa de Azariel	0.02 has	7	Rainfall	None (Rocks in the area)	More than 15	Not know	Own experience	No	Reforestation	Leave home and find a safe place	Government	Nothing
Carrizal	130	S/N	F	53	Finished Elementary	35	Housewife	Yes	Government support Oportunidades	Equal or less than 1000	No	Not know	Roads	Not Know	7	Hurricans	Growing corn and beans	More than 15	Landslides	Own experience	Yes	Reforestation	Not know	Government	Nothing
Carrizal	131	S/N	M	46	Finished Elementary	15	Own land	Yes	Government support Procampo	Equal or less than 1000	No	Not know	300 mts. Cercade la casa del sr. Hilario	0.016 has	7	Rainfall	None (Rocks in the area)	More than 15	Not know	Family	No	Reforestation	Leave home and find a safe place	Government	Nothing
Carrizal	132	S/N	M	35	Drop out elementary in forth grade	35	Own land	No	---------	---------	Yes	Landslides	400 mts cerca de la casa del sr. Cesar	0.002 has	7	Rainfall	None (Rocks in the area)	More than 15	Not know	Own experience	Yes	Government support	Leave home and find a safe place	Community then government	Nothing
Carrizal	133	S/N	M	40	Finished Elementary	40	Own land	Yes	Government support Procampo	Equal or less than 1000	Yes	Landslides	300 mts. Cerca de la casa de sr. Elfego	0.002 has	7	Rainfall	None (Rocks in the area)	Less than 5	Not know	Own experience	Yes	Government support	Leave home and find a safe place	Government	Reforestation
Carrizal	134	S/N	M	57	Finished Elementary	57	Own land	Yes	Government support Procampo	Equal or less than 1000	Yes	Infertility	Toda la comunidad	Not Know	7	Stan Hurrican (2005)	None (Rocks in the area)	More than 15	Not know	Own experience	No	Not know	Leave home and find a safe place	Government	Reforestation
Carrizal	135	S/N	M	72	Drop out elementary in second grade	72	Own land	Yes	Government support Procampo	Equal or less than 1000	Yes	Landslides	Cerca de la vega del rio	Everywhere	7	Rainfall	None (Rocks in the area)	Less than 5	Not know	Own experience	Yes	Reforestation	Leave home and find a safe place	Government	Nothing
Carrizal	136	S/N	M	33	Drop out elementary in fifth grade	6	Own land	No	---------	---------	No	Not know	Centro de Carrizal	0.5 has	7	Stan Hurrican (2005)	None (Rocks in the area)	More than 15	Rainfall scarcity	Own experience	Yes	Reforestation	Leave home and find a safe place	Community	Nothing
Carrizal	137	S/N	M	31	Finished Elementary	31	Own land	No	---------	---------	No	Not know	300 mts. Cerca de la casa de sr. Fredi	0.01 has	7	Rainfall	None (Rocks in the area)	More than 15	Human deaths	Own experience	Yes	Reforestation	Leave home and find a safe place	Government	Nothing
Carrizal	138	S/N	M	34	Drop out elementary in forth grade	34	Housewife	Yes	Government support Oportunidades	Equal or less than 1000	No	Not know	Cerca de la misma casa de la sra. Maricruz	0.003 has	7	Rainfall	Astilleros for firewood	Less than 5	Human deaths	Own experience	Yes	Reforestation	Leave home and find a safe place	Government	Reforestation
Carrizal	139	S/N	F	41	Finished Elementary	5	Housewife	Yes	Government support Oportunidades	Equal or less than 1000	No	Not know	Todo carrizal	11 has	14	Deforestation	Corn crops	More than 15	Mudslides	Own experience	Yes	Reforestation	Leave home and find a safe place	Government then community	Reforestation
Carrizal	140	S/N	M	74	Drop out elementary in first grade	74	Own land	Yes	Government support Procampo	Equal or less than 1000	No	Not know	No sabe	Not Know	Not Know	Stan Hurrican (2005)	Corn crops	Less than 5	Human deaths	Own experience	No	Terracing and reforestation	Not know	Government	Corn crops
Carrizal	141	S/N	F	39	Drop out elementary in forth grade	39	Own land	Yes	Government support Oportunidades	Equal or less than 1000	Yes	Landslides	Toda la comunidad	Not Know	7	Stan Hurrican (2005)	Corn crops	More than 15	Landslides	Family	Yes	Reforestation	Leave home and find a safe place	Government	Reforestation
Carrizal	142	S/N	F	29	Finished Elementary	29	Housewife	Yes	Government support Oportunidades	Equal or less than 1000	No	Not know	Cerca de plan grande	2 has	10	Hurricans	Corn crops	More than 15	Houses destruction	Own experience	Yes	Reforestation	Leave home and find a safe place	Community	Nothing
Carrizal	143	S/N	F	34	Drop out elementary in forth grade	34	Housewife	Yes	Government support Oportunidades	Equal or less than 1000	No	Not know	Cerca de la casa de sra. Leticia	1 ha	8	Stan Hurrican (2005)	Corn crops	More than 15	Landslides	Own experience	Yes	Reforestation	Leave home and find a safe place	Government	Nothing
Carrizal	144	S/N	F	29	Finished Elementary	9	Housewife	No	---------	---------	No	Not know	200 mts cerca de la casa del mismo Sra. Levita	2 has	8	Hurricans	Corn crops	More than 15	Landslides	Own experience	Yes	Reforestation	Leave home and find a safe place	Not know	Nothing
Carrizal	145	S/N	F	37	Drop out elementary in third grade	1	Housewife	Yes	Government support Oportunidades	Equal or less than 1000	Yes	Usage of chemical products in soil, causing contamination	Cerca de la casa 3 km	Not Know	7	Rainfall	Corn crops	Less than 5	Not know	Family	No	Reforestation	Leave home and find a safe place	Community	Corn crops
Carrizal	146	S/N	F	25	Finished Elementary	25	Housewife	No	---------	---------	No	Not know	Cerca de la misma casa	Not Know	7	Rainfall	Corn crops	Less than 5	Not know	Own experience	No	Reforestation	Leave home and find a safe place	Government	Corn crops
Carrizal	147	S/N	F	37	Finished Elementary	37	Housewife	Yes	Government support Oportunidades	Equal or less than 1000	No	Not know	Propio terreno de la sra. Micaela	0.5 has	7	Stan Hurrican (2005)	Corn crops	More than 15	Landslides	Own experience	Yes	Reforestation	Leave home and find a safe place	Not know	Reforestation
Carrizal	148	S/N	F	33	Finished Elementary	33	Housewife	Yes	Government support Oportunidades	Equal or less than 1000	No	Not know	No hay	Not Know	7	Not know	Astilleros for firewood	More than 15	Human deaths	Own experience	Yes	Reforestation	Leave home and find a safe place	Community	Reforestation
Carrizal	149	50	F	60	Drop out elementary in forth grade	60	Housewife	Yes	Government support Oportunidades	Equal or less than 1000	No	Not know	Toda la comunidad	Not Know	7	Stan Hurrican (2005)	Astilleros for firewood	More than 15	Landslides	Own experience	Yes	Reforestation	Leave home and find a safe place	Government	Reforestation
Carrizal	150	S/N	F	65	Drop out elementary in second grade	65	Housewife	Yes	Government support Oportunidades	Equal or less than 1000	No	Not know	50 mts cerca de la casa de sra. Amelia	0.0025 has	7	Rainfall	Astilleros for firewood	Less than 5	Not know	Own experience	No	Reforestation	Leave home and find a safe place	Not know	Reforestation
Carrizal	151	S/N	F	67	Drop out elementary in first grade	67	Housewife	Yes	Government support Oportunidades	Equal or less than 1000	No	Not know	Cerca de la casa del sr. Elfego Diaz Escalante	0.003 has	8	Stan Hurrican (2005)	Growing corn and beans	More than 15	Landslides	Own experience	Yes	Reforestation and make walls	Only wait	Government	Nothing
Carrizal	152	S/N	F	33	Finished Elementary	2	Housewife	No	---------	---------	No	Not know	En la frontera de carrizal y barrio Guadalupe	Not Know	7	Rainfall	Corn crops	More than 15	Mudslides	Family	Yes	Reforestation and make walls	Leave home and find a safe place	Community then government	Corn crops
Carrizal	153	S/N	F	27	Finished Elementary	27	Housewife	No	---------	---------	No	Not know	Cerca de Pizarrin	3 has	8	Slopes	Roads	More than 15	Human deaths	Own experience	Yes	Reforestation and stop construction of roads	Leave home and find a safe place	Community then government	Nothing
Carrizal	154	S/N	F	22	Finished Middle school	22	Housewife	Yes	Government support Oportunidades	Equal or less than 1000	No	Not know	Cerca de la Agencia Municipal	0.5 has	9	Hurricans	None (Rocks in the area)	More than 15	Landslides	Own experience	Yes	Reforestation and stop construction of roads	Leave home and find a safe place	Community	Reforestation
Carrizal	155	S/N	F	65	Unlettered	7	Housewife	No	---------	---------	No	Not know	No hay	Not Know	Not Know	Rainfall	None (Rocks in the area)	More than 15	Human deaths	Own experience	Yes	Terracing	Leave home and find a safe place	Government	Corn crops
Carrizal	156	S/N	F	35	Finished Elementary	35	Housewife	Yes	Government support Oportunidades	Equal or less than 1000	Yes	Landslides	En el propio terreno de la sra. Alba	2 has	8	Rainfall	Corn crops	More than 15	Human deaths	Own experience	Yes	Terracing and reforestation	Leave home and find a safe place	Government	Nothing
Carrizal	157	S/N	F	27	Finished Elementary	27	Housewife	No	---------	---------	No	Not know	Cerca de la casa 1 km	0.05 has	7	Deforestation	Corn crops	Less than 5	Not know	Own experience	Yes	Terracing and reforestation	Leave home and find a safe place	Community	Corn crops
Carrizal	158	S/N	F	50	Drop out elementary in third grade	20	Housewife	No	---------	---------	No	Not know	En el propio terreno	0.03 has	7	Rainfall	Corn crops	Less than 5	Not know	Family	Yes	Terracing and reforestation	Not know	Government	Corn crops
Carrizal	159	S/N	F	42	Drop out elementary in third grade	15	Housewife	Yes	Government support Oportunidades	Equal or less than 1000	No	Not know	Cerca del barrio Linda Vista terreno de la sra. Laurentina	1 ha	8	Deforestation	Astilleros for firewood	More than 15	Mudslides	Own experience	Yes	Terracing and reforestation	Only wait	Government	Reforestation
Carrizal	160	S/N	F	58	Finished Elementary	58	Housewife	Yes	Government support Oportunidades	Equal or less than 1000	Yes	Landslides	Roads	2 has	8	Hurricans	Roads	15	Human deaths	Own experience	Yes	Making walls	Leave home and find a safe place	Government then community	Nothing
La Union	161	S/N	F	54	Drop out elementary in forth grade	34	Housewife	No	---------	---------	No	Not know	Roads	7 has	7	Rainfall	None (Rocks in the area)	5	Soil unuse for crops	Own experience	Yes	Reforestation	Nothing	Government	Nothing
La Union	162	S/N	F	50	Drop out elementary in second grade	10	Housewife	Yes	Government support, amanecer	Equal to 1500	No	Not know	Roads	1 ha	7	Stan Hurrican (2005)	None (Rocks in the area)	5	Deforestation	Own experience	Yes	Reforestation	Leave home and find a safe place	Community	Not know
La Union	163	S/N	F	42	Finished Elementary	22	Housewife	Yes	Government support Oportunidades	Equal or less than 1000	No	Not know	El terreno del sr. Miguel Zunun y del sr. Victor Velazquez	1.5 has	8	Stan Hurrican (2005)	None (Rocks in the area)	More than 15	Landslides	Own experience	Yes	Reforestation	Leave home and find a safe place	No one	Nothing
La Union	164	S/N	F	39	Drop out elementary in third grade	25	Housewife	No	---------	---------	No	Not know	Terreno de la sra. Ana, cerca de la casa del sr. David y del sr. Elfego	3 has	5	Hurricans	Growing corn and beans	15	Landslides	Own experience	Yes	Reforestation	Leave home and find a safe place	Community	Walls
La Union	165	S/N	F	21	Drop out elementary in third grade	2	Housewife	No	---------	---------	No	Not know	Cerca de la casa de la sra. Aurora	6 cuerdas	8	Rainfall	Corn crops	More than 15	Mudslides	Own experience	Yes	Reforestation	Leave home and find a safe place	Government	Nothing
La Union	166	S/N	F	72	Unlettered	72	Housewife	No	---------	---------	No	Not know	Close to Municipal Agency	0.001 has	Not Know	Rainfall	Corn crops	More than 15	Not know	Own experience	Yes	Reforestation	Leave home and find a safe place	Government	Corn crops
La Union	167	S/N	M	66	Finished Elementary	66	Own land	Yes	Government support Procampo	Equal or less than 1000	No	Not know	No sabe	0.5 has	1	Stan Hurrican (2005)	None (Rocks in the area)	5	Soil unuse for crops	Own experience	Yes	Terracing	Ask for help to the authorities	Community	Terracing and reforestation
La Union	168	S/N	M	45	Finished Elementary	45	Own land	No	---------	---------	Yes	Landslides	Propio terreno del sr. Francisco	0.5 has	7	Rainfall and Land without protection	None (Rocks in the area)	More than 15	Landslides	Own experience	Yes	Terracing and reforestation	Leave home and find a safe place	God	Reforestation
La Union	169	S/N	M	36	Drop out elementary in forth grade	36	Own land	No	---------	---------	No	Not know	Close to the same home (500 mts approx)	4 has	7	Mitch Hurrican (1998)	Growing corn and beans	More than 15	Landslides	Own experience	Yes	Terracing and reforestation	Leave home and find a safe place	Not know	Nothing
La Union	170	S/N	M	25	Drop out elementary in third grade	25	Own land	Yes	Government support Oportunidades	Equal or less than 1000	No	Not know	No sabe especificamente	1 ha	7	Hurricans	None (Rocks in the area)	Less than 5	Soil unuse for crops	Own experience	Yes	Reforestation	Leave home and find a safe place	Community	Reforestation
La Union	171	S/N	M	47	Drop out elementary in second grade	47	Own land	Yes	Government support Procampo	Equal or less than 1000	No	Not know	El terreno del sr. Miguel Zunun	1 ha	8	Roads constructions	None (Rocks in the area)	More than 15	Mudslides	Own experience	Yes	Reforestation	Leave home and find a safe place	Community	Nothing
La Union	172	S/N	M	65	Drop out elementary in second grade	65	Own land	Yes	Government support Procampo	Equal or less than 1000	Yes	Earthquakes, and land subsidence due to rain	Close to Municipal Agency	0.002 has	14	Mitch Hurrican (1998)	None (Rocks in the area)	More than 15	Not know	Own experience	Yes	Terracing and reforestation	Leave home and find a safe place	Community	Corn crops
La Union	173	S/N	M	42	Drop out elementary in forth grade	20	Own land	No	---------	---------	Yes	Landslides	Close to Municipal Agency	0.005 has	14	Rainfall	None (Rocks in the area)	More than 15	Not know	Own experience	Yes	Terracing and reforestation	Leave home and find a safe place	Community	Nothing
La Union	174	S/N	M	34	Drop out elementary in second grade	34	Own land	Yes	Government support Procampo	Equal or less than 1000	No	Not know	Cerca de la casa del sr. Emigdio Gomez	0.005 has	5	Rivers	Corn crops	Less than 5	Not know	Own experience	Yes	Terracing and reforestation	Leave home and find a safe place	Government	Nothing
La Union	175	S/N	F	23	Finished Elementary	19	Housewife	No	---------	---------	No	Not know	Cerca de la casa del agente mpal. Sr. Ermenegildo	2 has	7	Hurricans	Astilleros for firewood	More than 15	Landslides	Own experience	Yes	Reforestation	Leave home and find a safe place	Government then community	Nothing
Plan gde.	176	S/N	F	60	Drop out elementary in first grade	5	Housewife	Yes	Government support Oportunidades	Equal or less than 1000	Yes	Disasters	100 mts cerca de su misma casa	0.001 has	7	Stan Hurrican (2005)	Corn crops	Less than 5	Not know	Own experience	No	God will	Leave home and find a safe place	Government then community	Corn crops
Plan gde.	177	S/N	F	83	Unlettered	83	Housewife	Yes	Government support Amanecer y 70 y mas	Equal or less than 1000	No	Not know	En el terreno de la misma sra. Paula	1 ha	10	Rainfall	Corn crops	More than 15	Landslides	Own experience	Yes	Reforestation	Leave home and find a safe place	Government	Reforestation
Plan gde.	178	S/N	F	18	Finished Middle school	2	Housewife	No	---------	---------	No	Not know	Cerca de Vicente Guerrero	5 has	8	Rainfall	Not know	Not know	Landslides	Own experience	Yes	Reforestation	Leave home and find a safe place	Not know	Reforestation
Plan gde.	179	S/N	F	26	Finished Middle school	26	Housewife	No	---------	---------	No	Not know	Roads	5 has	8	Hurricans	Grazing of cattle, sheep and horses	More than 15	Landslides	Own experience	Yes	Reforestation	Leave home and find a safe place	Government then community	Reforestation
Plan gde.	180	S/N	F	28	Finished Elementary	28	Housewife	Yes	Government support Oportunidades	Equal or less than 1000	Yes	Global warming, dry soil, forest fires	Cerca de la vega del rio	10 has	8	Hurricans	Corn crops	More than 15	Landslides	Government program	Yes	Reforestation	Help affected houses	Community	Reforestation
Plan gde.	181	59	M	59	Finished Elementary	59	Own land	Yes	Government support Procampo	Equal or less than 1000	Yes	Soil depletion due to lack of trees	Astilleros	6 has	14	Mitch Hurrican (1998)	Vegetables (Harvest jalapeño chile, beans, carrots)	More than 15	Soil unuse for crops	School	Yes	Terracing and reforestation	Leave home and find a safe place	Community	Reforestation
Plan gde.	182	S/N	M	78	Drop out elementary in second grade	3	Own land	Yes	Government support 70 y mas	Equal or less than 1000	No	Not know	Astilleros	2 has	7	Stan Hurrican (2005)	Astilleros for firewood	More than 15	Landslides	Own experience	No	It cannot be reduced	Leave home and find a safe place	Government then community	Green house
Plan gde.	183	S/N	M	56	Drop out elementary in fifth grade	8	Own land	Yes	Government support Procampo	Equal or less than 1000	No	Not know	Terreno del sr. Roberto	4 has	8	Rainfall	Corn crops	More than 15	Landslides	Own experience	Yes	Reforestation	Leave home and find a safe place	Government then community	Nothing
Plan gde.	184	S/N	M	59	Drop out elementary in second grade	40	Housewife	Yes	Government support Oportunidades	Equal or less than 1000	No	Not know	Terreno del sr. Roberto	1 ha	10	Rainfall	Growing corn and beans	More than 15	Landslides	School	Yes	Terracing and reforestation	Leave home and find a safe place	Community	Reforestation
Plan gde.	185	S/N	M	58	Finished Elementary	25	Own land	Yes	Government support Procampo	Equal or less than 1000	Yes	Soil depletion due to lack of trees	Terreno del sr. Benerando y sra. Dominga Gomez	2 has	10	Hurricans	Corn crops	More than 15	Landslides	School	Yes	Terracing and reforestation	Leave home and find a safe place	Community then government	Terracing
Plan gde.	186	S/N	M	60	Finished Elementary	30	Own land	No	---------	---------	Yes	Disasters	Astilleros	0.006 has	14	Mitch Hurrican (1998)	Astilleros for firewood	More than 15	Mudslides	Community workshops	Yes	Terracing and reforestation	Ask for help to the authorities	Community	Terracing and reforestation
Plan gde.	187	S/N	M	53	Drop out elementary in third grade	53	Out of town	No	---------	---------	No	Not know	Astilleros	10 has	7	Stan Hurrican (2005)	Astilleros for firewood	More than 15	Mudslides	Own experience	No	God will	Only wait	God	Nothing
Plan gde.	188	S/N	M	43	Finished Elementary	16	Own land	Yes	Government support Procampo	Equal or less than 1000	Yes	Landslides	Cerca de la casa del sr. Meliton y a un lado de la misma casa del sr. Dario	1 ha	8	Rainfall	Corn crops	More than 15	Mudslides	Own experience	Yes	Reforestation	Leave home and find a safe place	Government	Nothing
Plan gde.	189	S/N	M	58	Drop out elementary in fifth grade	30	Own land	Yes	Government support Procampo	Equal or less than 1000	Yes	Landslides	En el propio terreno	0.5 has	8	Hurricans	Corn crops	More than 15	Mudslides	Own experience	Yes	Terracing and reforestation	Leave home and find a safe place	Government	Nothing
Plan gde.	190	244	M	52	Drop out elementary in third grade	52	Own land	No	---------	---------	Yes	Landslides	Close to Municipal Agency	0.5 has	7	Rainfall	Corn crops	Less than 5	Not know	Own experience	No	Not know	Leave home and find a safe place	Government	Corn crops
Plan gde.	191	S/N	M	27	Finished Elementary	2	Own land	No	---------	---------	Yes	Landslides	Cerca del rio y areas de cultivo	Not Know	7	Stan Hurrican (2005)	Not know	Less than 5	Not know	Own experience	Yes	Reforestation	Leave home and find a safe place	Government	Nothing
Plan gde.	192	S/N	M	38	Drop out elementary in second grade	38	Own land	No	---------	---------	Yes	Landslides	Cerca de la casa del sr. Aurelio	0.04 has	7	Stan Hurrican (2005)	Corn crops	Less than 5	Not know	Own experience	No	It cannot be reduced	Leave home and find a safe place	Government	Nothing
Plan gde.	193	S/N	M	35	Drop out elementary in forth grade	7	Own land	Yes	Government support Procampo	Equal or less than 1000	Yes	Usage of chemical products in soil, causing contamination	1.5 km cerca de la casa del sr. Hipolito	0.5 has	7	Rainfall	None (Rocks in the area)	Not know	Not know	Own experience	Yes	Terracing and reforestation	Leave home and find a safe place	Not know ( They asked for help to the government, they did not give nothing)	Nothing
Plan gde.	194	S/N	M	57	Finished Elementary	57	Own land	Yes	Government support Procampo	Equal or less than 1000	Yes	Landslides	80 mts cerca de la casa del sr. Artemio	0.006 has	7	Stan Hurrican (2005)	Astilleros for firewood	More than 15	Not know	Own experience	Yes	Terracing and reforestation	Leave home and find a safe place	Government	Nothing
Plan gde.	195	S/N	M	65	Drop out elementary in third grade	65	Own land	Yes	Government support Procampo	Equal or less than 1000	Yes	Landslides	Terreno del sr. Gerardo y la misma casa con la pared y el piso partidos	2 has	8	Hurricans	Corn crops	More than 15	Human deaths	Government program	Yes	Reforestation	Leave home and find a safe place	Government	Nothing
Plan gde.	196	S/N	M	35	Finished Elementary	35	Own land	No	---------	---------	No	Not know	Astilleros	0.014 has	Not Know	Hurricans	None (Rocks in the area)	More than 15	Rainfall scarcity	Own experience	Yes	Reforestation	Only wait	Community	Reforestation
Plan gde.	197	S/N	F	34	Drop out elementary in fifth grade	2	Housewife	No	---------	---------	Yes	Landslides	500 mts cerca de su misma casa	0.003 has	1	Rainfall	Astilleros for firewood	Less than 5	Not know	Own experience	Yes	Reforestation	Leave home and find a safe place	Government	Reforestation
Plan gde.	198	S/N	F	29	Drop out elementary in third grade	5	Housewife	Yes	Government support Oportunidades	Equal or less than 1000	No	Not know	Orillas de la carretera	6 has	5	Stan Hurrican (2005)	Astilleros for firewood	More than 15	Landslides	Television	Yes	Stop trees cuting	Ask for help to the authorities	Community then government	Reforestation
Plan gde.	199	S/N	F	26	Drop out elementary in second grade	2	Housewife	Yes	Government support Oportunidades	Equal or less than 1000	Yes	Landslides	Cerca de la vega del rio	Not Know	7	Not know	None (Rocks in the area)	Not know	Not know	Own experience	Yes	Terracing and reforestation	Leave home and find a safe place	Government	Nothing
Vicente Gerrero	200	52	F	52	Drop out elementary in second grade	52	Housewife	Yes	Government support Oportunidades	Equal or less than 1000	Yes	Not remember	Terreno propio a lado de V.G los 2 lados	5 has	8	Hurricans	Corn crops	More than 15	Mudslides	ECOSUR	No	Not know	Leave home and find a safe place	Community	Not know
Vicente Gerrero	201	9	F	38	Drop out elementary in fifth grade	15	Housewife	Yes	Government support Oportunidades	Equal or less than 1000	No	Not know	Lado de la agencia municipal de V.G	3 has	7	Hurricans	Corn crops	More than 15	Landslides	Community workshops	No	Not know	Leave home and find a safe place	Government	Nothing
Vicente Gerrero	202	S/N	F	27	Finished Elementary	27	Land renting	Yes	Government support Oportunidades	Equal or less than 1000	No	Not know	Lansdlides close to kind garden	4 has	14	Hurricans	None (Rocks in the area)	5	Soil unuse for crops	Own experience	Yes	Reforestation	Leave home and find a safe place	Civil protection	Reforestation
Vicente Gerrero	203	42	F	44	Drop out elementary in third grade	44	Housewife	Yes	Government support Oportunidades	Equal or less than 1000	No	Not know	Cerca de la casa de la sra. Florentina Rodriguez Mejia (1 km)	200 mts	7	Rainfall	None (Rocks in the area)	Not know	Not know	Own experience	No	Reforestation	Leave home and find a safe place	Government	Reforestation
Vicente Gerrero	204	S/N	F	22	Finished Elementary	22	Housewife	No	---------	---------	No	Not know	Los dos lados de vicente guerrero	3 has	7	Slopes	None (Rocks in the area)	More than 15	Landslides	Own experience	Yes	Reforestation	Leave home and find a safe place	Community	Not know
Vicente Gerrero	205	S/N	F	47	Drop out elementary in third grade	30	Own land	Yes	Government support Oportunidades y Procampo	Equal or less than 1000	No	Not know	Lansdlides close to kind garden	2 has	14	Deforestation	None (Rocks in the area)	15	Not know	Own experience	Yes	Reforestation	Leave home and find a safe place	Not know	Not know
Vicente Gerrero	206	S/N	F	45	Drop out elementary in third grade	45	Own land	Yes	Government support Oportunidades	Equal or less than 1000	No	Not know	Lansdlides close to kind garden	4 has	14	Hurricans	None (Rocks in the area)	More than 15	Houses destruction	Own experience	Yes	Reforestation	Make organization groups for reforestation	Community	Reforestation
Vicente Gerrero	207	S/N	F	18	Finished Middle school	18	Housewife	Yes	Government support Oportunidades	Equal or less than 1000	No	Not know	Lansdlides close to kind garden	1 ha	8	Hurricans	None (Rocks in the area)	More than 15	Houses destruction	Own experience	Yes	Reforestation	Help affected houses	Community	Reforestation
Vicente Gerrero	208	S/N	F	50	Drop out elementary in second grade	14	Housewife	No	---------	---------	No	Not know	Los dos lados de vicente guerrero	Not Know	7	Stan Hurrican (2005)	None (Rocks in the area)	10	Landslides	Own experience	Yes	Reforestation	Leave home and find a safe place	Not know	Nothing
Vicente Gerrero	209	45A	F	32	Drop out elementary in forth grade	32	Housewife	Yes	Government support Oportunidades	Equal or less than 1000	No	Not know	Cerca de la escuela	2 has	10	Stan Hurrican (2005)	Human settlement	More than 15	Landslides	Community workshops	Yes	Reforestation	Ask for help to the authorities	Community	Nothing
Vicente Gerrero	210	S/N	F	38	Drop out elementary in fifth grade	38	Housewife	Yes	Government support Oportunidades	Equal or less than 1000	No	Not know	All Vicente guerrero	10 has	More than 40	Hurricans	Corn crops	More than 15	Not know	Own experience	Yes	Reforestation	Run	Community then government	Reforestation
Vicente Gerrero	211	47	F	21	Secondary (1)	2	Housewife	No	---------	---------	No	Not know	Cerca de la escuela	Not Know	10	Hurricans	Corn crops	More than 15	Deforestation	Own experience	Yes	Reforestation	Leave home and find a safe place	Community then government	Nothing
Vicente Gerrero	212	12	F	63	Unlettered	5	Housewife	Yes	Government support Oportunidades	Equal or less than 1000	No	Not know	Lado de la agencia municipal de V.G	2 has	7	Hurricans	Corn crops	More than 15	Landslides	Own experience	Yes	Reforestation	Ask for help to the authorities	Government	Nothing
Vicente Gerrero	213	41	F	40	Drop out elementary in first grade	25	Housewife	Yes	Government support Oportunidades	Equal or less than 1000	Yes	Soil depletion due to lack of trees	Close to the same home (500 mts approx)	200 mts	7	Deforestation	Astilleros for firewood	Less than 5	Human deaths	Own experience	Yes	Reforestation	Leave home and find a safe place	Not know	Reforestation
Vicente Gerrero	214	33	F	38	Finished Middle school	38	Housewife	No	---------	---------	Yes	Landslides	300 cerca de la misma casa	200 mts	7	Deforestation	Astilleros for firewood	Less than 5	Not know	Family	Yes	Reforestation	Exit and take refuge in a safe place	Community then government	Reforestation
Vicente Gerrero	215	46	M	28	Finished Elementary	28	Own land	No	---------	---------	No	Not know	En el centro de la comunidad	2 has	8	Stan Hurrican (2005)	Corn crops	More than 15	Deforestation	Own experience	Yes	Reforestation	Leave home and find a safe place	Community then government	Reforestation
Vicente Gerrero	216	S/N	M	28	Finished Elementary	28	Own land	Yes	Government support Oportunidades	Equal or less than 1000	No	Not know	Sobre carretera, cerca de la primaria	2 has	14	Hurricans	None (Rocks in the area)	More than 15	Soil unuse for crops	Own experience	Yes	Reforestation	Leave home and find a safe place	Community	Terracing
Vicente Gerrero	217	27	M	38	Finished Elementary	38	Own land	Yes	Government support Oportunidades	Equal or less than 1000	No	Not know	Por las cañadas y por todas partes	15-20 has	6	Deforestation	None (Rocks in the area)	More than 15	Soil unuse for crops	Own experience	Yes	Reforestation	Help affected houses	Community	Terracing
Vicente Gerrero	218	S/N	M	28	Finished Elementary	28	Own land	Yes	Government support Procampo	Equal or less than 1000	No	Not know	Cerca del kinder y por varias partes de la comunidad	3 has	7	Stan Hurrican (2005)	None (Rocks in the area)	5	Soil unuse for crops	Own experience	Yes	Reforestation and make walls	Ask for help to the authorities	Government	Reforestation
Vicente Gerrero	219	7	M	50	Finished Elementary	50	Own land	No	---------	---------	Yes	Usage of chemical products in soil, causing contamination	Los dos lados de vicente guerrero	10 has	15	Pollution, trash, plastic and fires burning	None (Rocks in the area)	More than 15	Soil unuse for crops	Government program	Yes	Environmental education	Ask for help to the authorities	Community	Reforestation
Vicente Gerrero	220	41	M	42	Drop out elementary in fifth grade	42	Own land	Yes	Government support Procampo	Equal or less than 1000	No	Not know	Los dos lados de vicente guerrero	5 has	72	Deforestation	Corn crops	More than 15	Soil unuse for crops	Television	Yes	Terracing and reforestation	Leave home and find a safe place	Government	Nothing
Vicente Gerrero	221	34	M	32	Drop out elementary in fifth grade	32	Own land	No	---------	---------	No	Not know	Cerca dela escuela primaria	3 has	8	Rainfall	Corn crops	More than 15	Landslides	Family	Yes	Not know	Make organization groups for reforestation	Government	Nothing
Vicente Gerrero	222	43	M	43	Drop out elementary in third grade	43	Out of town	No	---------	---------	No	Not know	Todo Vicente Guerrero	2 has	14	Hurricans	None (Rocks in the area)	More than 15	Landslides	Own experience	Yes	Reforestation	Leave home and find a safe place	Government then community	Nothing
Vicente Gerrero	223	45	M	85	Drop out elementary in first grade	85	Own land	Yes	Government support Procampo	Equal or less than 1000	No	Not know	Cerca de la escuela y cerca de la misma casa de Don Juan	2 has	8	Rainfall and Land without protection	Corn crops	More than 15	Landslides	Family	Yes	Reforestation	Leave home and find a safe place	Government	Reforestation
Vicente Gerrero	224	31	M	18	Finished Middle school	18	Own land	No	---------	---------	No	Not know	Terreno del sr. Octaviano	2 has	8	Rainfall	Corn crops	More than 15	Landslides	Family	Yes	Reforestation	Leave home and find a safe place	Community	Reforestation
Vicente Gerrero	225	S/N	M	28	Drop out elementary in forth grade	7	Own land	No	---------	---------	No	Not know	Cerca de la casa del sr. Octaviano	2 has	4	Rainfall	Corn crops	More than 15	Landslides	Own experience	Yes	Terracing and reforestation	Leave home and find a safe place	Government	Nothing
Vicente Gerrero	226	S/N	M	32	Drop out elementary in fifth grade	32	Own land	No	---------	---------	No	Not know	Alrededor de V. G	200 has	14	Mitch Hurrican (1998)	Astilleros for firewood	3	Mudslides	Own experience	Yes	Terracing and reforestation	Make walls	Community	Reforestation
Vicente Gerrero	227	2	M	34	Finished Elementary	34	Own land	No	---------	---------	Yes	Soil depletion due to lack of trees	Los dos lados de vicente guerrero	5-6 has	8	Slopes	Astilleros for firewood	More than 15	Mudslides	Own experience	No	Not know	Leave home and find a safe place	Government	Nothing
Vicente Gerrero	228	S/N	M	34	Drop out elementary in forth grade	34	Own land	No	---------	---------	No	Not know	De la escuela 250 mts hacia abajo	1 ha	6	Disaster	None (Rocks in the area)	More than 15	Mudslides	Own experience	Yes	Reforestation	Leave home and find a safe place	Community then government	Reforestation
Vicente Gerrero	229	S/N	M	42	Drop out elementary in third grade	42	Own land	Yes	Government support Procampo	Equal or less than 1000	No	Not know	All Vicente guerrero	10 has	50	Hurricans	Corn crops	More than 15	Mudslides	School	Yes	Reforestation	Leave home and find a safe place	Community	Stopping tree cutting
Vicente Gerrero	230	49	M	34	Drop out elementary in third grade	3	Town (out of home)	No	---------	---------	No	Not know	Terreno del sr. Octaviano	300 mts	7	Rainfall	Ravines	More than 15	Not know	Own experience	No	It cannot be reduced	Leave home and find a safe place	Government	Nothing
Vicente Gerrero	231	50	M	47	Drop out elementary in second grade	47	Own land	No	---------	---------	Yes	Earthquakes, and land subsidence due to rain	Cerca de la casa del sr. Jorge Fco. Velazquez Lopez	300 mts	7	Rainfall	Growing corn and beans	7	Not know	Own experience	Yes	Reforestation	Leave home and find a safe place	Community	Nothing
Vicente Gerrero	232	S/N	M	77	Drop out elementary in first grade	77	Own land	Yes	Government support, amanecer	Equal or less than 1000	No	Not know	Close to the same home (500 mts approx)	200 mts	7	Deforestation	Astilleros for firewood	Less than 5	Not know	Own experience	Yes	Reforestation and make channels	Leave home and find a safe place	Community	Reforestation
Vicente Gerrero	233	S/N	M	65	Drop out elementary in second grade	65	Own land	Yes	Government support Procampo	Equal or less than 1000	No	Not know	Close to the same home (500 mts approx)	150 mts	7	Agriculture	Astilleros for firewood	Less than 5	Not know	Own experience	Yes	Reforestation and make channels	Leave home and find a safe place	Government	Reforestation
Vicente Gerrero	234	S/N	M	26	Finished high school	1	Out of town	Yes	Teacher	Equal or less than 2500	Yes	Global warming, dry soil, forest fires	Cerca del rio y areas de cultivo	10 % del terreno	Not Know	Not know	Vegetables (Harvest jalapeño chile, beans, carrots)	Not know	Not know	Own experience	Yes	Stop trees cuting	Make organization groups for reforestation	Community	Not know
Vicente Gerrero	235	S/N	M	68	Drop out elementary in second grade	68	Own land	Yes	Government support Amanecer y Procampo	Equal or less than 1000	No	Not know	Terreno del sr. Emiliano (300 mts)	300 mts	7	Rainfall	Corn crops	Less than 5	Not know	Own experience	Yes	Terracing and reforestation	Leave home and find a safe place	God	Reforestation
Vicente Gerrero	236	8	M	47	Drop out elementary in third grade	47	Own land	Yes	Government support Procampo	Equal or less than 1000	No	Not know	En el propio terreno y en el Astillero	5 has	14	Mitch Hurrican (1998)	Astilleros for firewood	More than 15	Not know	Government program	Yes	Walls	Leave home and find a safe place	Community then government	Reforestation
																	16.2602
