# Supplementary material for: Assessment of Soil Erosion Vulnerability in the Heavily Populated and Ecologically Fragile Communities in Motozintla De Mendoza, Chiapas, Mexico
Source: Copernicus journal article supplement (doi:10.5194/se-2017-85), 2017-11-01
Supplement: Supplementary file 3 [file survey.docx]

### 2. Questionnaire for KAP surveys

ENGLISH VERSION

Knowledge, attitudes and practices survey (KAP) on soil erosion.

Community: _____________________________________________________________

Date: ___________________________________________________________________

Time:___________________________________________________________________

Home number: ___________________________________________________________

Name of Interviewer:______________________________________________________

1.-What is your name? _____________________________________________________

2.-How old are you? _____ Years

3.-Sex: F/M

4.-What level of studies do you have?

a) Elementary school____ (Year) b) Secondary school____ (Year) c) High school____(Year) d)Other (specify) ________________________(Year)

5.-How long have you been living in this community? ________ (Years)

6.-Where do you work?

a) In your own land (inside of your lands____, b) Village (outside the house) ____, c) Outside the Village ____ d) Other (specify)____________________________________

7.-Do you receive some economics incomes? No/ Yes

(If it is yes, ask the following)

8.-What kind of payment do you receive?

a) Wage____ b) Support of some government program____ (Specify) _______________
9.-How much do you earn each month?

a) Equal or less than 1000____ b) 1500____ c) 2000____ d) Equal or more than 2500____

**Knowledge:**
1.-Have you heard about the problems of soil erosion (soil loss caused by water or wind)? No/Yes
2.-Do you know what soil erosion is?

________________________________________________________________________________________________________________________________________________
3.-Do you know what the most eroded area of ​​the community is?

________________________________________________________________________________________________________________________________________________
4.-Do you know the extent of eroded area (hectares)?

________________________________________________________________________
5.-Do you know since when it has been eroded?

________________________________________________________________________

6.-Do you know what caused or what were the factors of soil erosion in these areas?
________________________________________________________________________________________________________________________________________________
7.-What kind of land use is into those eroded areas?

________________________________________________________________________________________________________________________________________________
8.-How long those areas have been used (years)?

a)Less than 5 Years**____** b) 5 Years**____** c) 10 Years**____** d) 15 Years**____** e)over 15 years**____**
9.-Do you know which are the consequences of having areas with ease of erosion?
_______________________________________________________________________________________________________________________________________________
10.-Where they got the knowledge’s from?

A) Family**____** b) School**____** c) Government programs**____** d) Church**____** e) Other (specify)_________________________

**Attitudes:**

Having the knowledge of areas subject to soil erosion:

1.-Do you think there are solutions to the problem? No / Yes

2.-How would you help to reduce these areas?

________________________________________________________________________________________________________________________________________________
3.-If in your locality a landslide occurs, what do you do in those times?

________________________________________________________________________________________________________________________________________________
4.-Who do you think should solve the problem of erosion?

________________________________________________________________________

**Practices:**

1. - What are the practices to reduce soil erosion in your community?

________________________________________________________________________________________________________________________________________________

SPANISH VERSION

Encuestas de Conocimientos, Actitudes y Practicas (CAP) sobre la erosión de suelos.

Comunidad: _____________________________________________________________

Fecha: __________________________________________________________________

Hora:___________________________________________________________________

Numero de casa: __________________________________________________________

Nombre del entrevistador (a): _______________________________________________

1.-¿Cuál es su nombre?____________________________________________________

2.-¿Cuántos años tiene?_____ años

3.-Sexo: F/M

4.- ¿Qué grado de estudio tiene?

Primaria_____(Año)Secundaria_____(Año)Preparatoria_____(Año)Otro (especifique) ___(Año)

5.- ¿Cuánto tiempo tiene viviendo en esta comunidad?_______ (años)

6.- ¿Dónde trabaja usted?

a) En su propio terreno____, b) Pueblo (Fuera de casa) ____, c) Fuera del pueblo____, d) Especifique ____________________________________________________________

7.- ¿Recibe ingresos económicos? No/Si

(Si la respuesta es si, preguntar lo siguiente)

8.- ¿Que tipo de pago recibe?

a) Salario____ b) Apoyo de algún programa de gobierno____(especifique)____________

9.- ¿Cuánto gana mensualmente? a) Igual o menos de 1000_____ b) 1500____ c) 2000_____ d) Igual o más de 2500_____

**Conocimientos:**

1.- ¿Ha escuchado acerca del problema de la erosión de suelos, (perdida de suelo por causa de agua o viento)? No / Si

2.- ¿Sabe usted que es la erosión de suelos?

________________________________________________________________________

­­­­­­­­­­­­­­­­­­­­­­­­­­­­­­­­­­_______________________________________________________________________

3.- ¿Sabe usted, cual es el área mas erosionada de la comunidad?

­­­­­­­­­­­­­­­­­­­­­­­­­­­­­­­­­­­­_______________________________________________________________________

­­­­­­­­­­­­­­­­­­­­­­­­­­­­­­­­­­­­_______________________________________________________________________

4.- ¿Sabe usted, cual es la extensión del área erosionada (hectáreas)? ________________________________________________________________________

5.- ¿Sabe usted desde cuando se ha ido erosionando? ­­­­­­­­­­­­­­­­­­________________________________________________________________________

6.- ¿Sabe usted, qué ocasiono o cuales fueron los factores de la erosión del suelo de esas áreas?

­­­­­­­­­­­­­­­­­­­­­­­­­­­­­­­­­­­­_______________________________________________________________________

­­­­­­­­­­­­­­­­­­­­­­­­­­­­­­­­­­­­_______________________________________________________________________

7.- ¿Sabe usted, que tipo de uso de suelo esta dentro de las áreas erosionadas?

________________________________________________________________________________________________________________________________________________

8.- ¿Sabe usted, hace cuando tiempo se han estado usando esas áreas (años)?

a) Menos de 5 años____ b) 5 años____ c) 10 años ____d) 15 años____ e) Más de 15 años____

­­­­­­­­­­­­­­­­­­­­­­­­­­­­­­­­­­­ 9.- ¿Sabe usted, cuáles son las consecuencias de tener áreas con facilidad de erosión?

­­­­­­­­­­­­­­­­­­­­­­­­­­­­­­­­­­­­________________________________________________________________________

­­­­­­­­­­­­­­­­­­­­­­­­­­­­­­­­­­­­_______________________________________________________________________

10.- ¿De donde obtuvo usted estos conocimientos?

a) Familia____ b) Escuela____ c) Programas de gobierno____ d) Iglesia____e) Otros ____ (Especifique)_________________________

**Actitudes:**

Teniendo los conocimientos acerca de las áreas sujetas a la erosión de suelos:

1.- ¿Piensa usted que hay soluciones al problema? No / Si

2.- ¿Como ayudaría a reducir esas áreas?

_______________________________________________________________________________________________________________________________________________
3.- ¿Si en tu comunidad ocurre un deslave, que hace usted en esos momentos?

________________________________________________________________________________________________________________________________________________
4.- ¿Quien cree usted que debería de resolver los problemas de erosión?
________________________________________________________________________

**Prácticas:**

¿Cuáles son las prácticas para reducir la erosión de suelos en su comunidad?

­­­­­­­­­­­­­­­­­­­­­­­­­­­­­­­­­­­­________________________________________________________________________

­­­­­­­­­­­­­­­­­­­­­­­­­­­­­­­­­­­________________________________________________________________________

### 3. Consent statement

ENGLISH VERSION

Orally Given Informed Consent Statement

"I am a student of the Master of Science in Environmental Engineering from Michigan Technological University, I am conducting an assessment of soil vulnerability to erosion in (the community of ...) and also in other communities in Motozintla de Mendoza , Chiapas. The information collected will be presented in an academic report. It is expected that the results of this study will be useful to the community. I would like to ask you specific questions about knowledge, attitudes and practices regarding soil loss. You can make me questions or offer other information you consider important, even if information not requested. The survey will last approximately 40 minutes.

You are not required to speak with me or answer all questions. If you agree to answer questions now, and later during the survey decide you do not want answer, you can tell me as well. In the same way, if you do not want to answer a question, you can tell me and move to the next. Nothing bad can happen, either you or me, if you decide not to participate in the survey. "

SPANISH VERSION

Declaración Verbal de Consentimiento Informado

“Soy estudiante de la Maestría en Ciencias en Ingeniería Ambiental de la Universidad Tecnológica de Michigan; estoy realizando una evaluación de la vulnerabilidad del suelo a la erosión *(la comunidad de …)* y también en otras comunidades Motozintla de Mendoza, Chiapas. La información recogida se presentará en un reporte académico. Se espera que los resultados de este estudio puedan ser de utilidad para la misma comunidad. Me gustaría hacerle(s) preguntas especificas sobre conocimientos, actitudes y practicas referente a la perdida de suelos. Usted también me puede hacer preguntas u ofrecer otras informaciones que usted considere importante, aunque sea información que no solicito. La encuesta tendrá una duración de aproximadamente 40 minutos.

No es obligación que usted hable conmigo o que conteste todas las preguntas. Si usted está de acuerdo en contestar las preguntas ahora, y después o durante la encuesta decide que ya no quiere contestar, puede decírmelo también. De igual manera. Si usted no quiere contestar una pregunta, puede decirlo, y pasaremos a la próxima. Nada malo puede pasarnos, ni a usted, ni a mí, si usted decide que no quiere participar en la encuesta.”
